# Supplementary material for: Phase Ib study of the combination of pexidartinib (PLX3397), a CSF-1R inhibitor, and paclitaxel in patients with advanced solid tumors
Source: PubMed Central journal article supplement — Ther Adv Med Oncol. 2019 Jun 21;11:1758835919854238. doi: 10.1177/1758835919854238 (PMC6589951; doi:10.1177/1758835919854238), 2019-06-21
Supplement: Supplementary_Tables.pdf [file Supplementary_Tables.pdf]

**Supplementary Table S1:** Summary of Actions Taken with Pexidartinib as a Result of Adverse Events at Least Possibly Related to Pexidartinib

| Number of Patients:                | 600 mg (N=9) | 800 mg (N=3) | 1000 mg (N=3) | 1200 mg (N=6) | 1600 mg (N=33) | All Cohorts (N=54) |
|------------------------------------|--------------|--------------|---------------|---------------|----------------|--------------------|
| Pexidartinib Temporarily Withdrawn | 2            | 0            | 2             | 3             | 12             | 19                 |
| Pexidartinib Dose Reduced          | 0            | 0            | 0             | 2             | 4              | 6                  |
| Pexidartinib Permanently Withdrawn | 1            | 0            | 0             | 0             | 4              | 5                  |

**Supplementary Table S2:** Summary of Actions Taken with Paclitaxel as a Result of Adverse Events at Least Possibly Related to Paclitaxel

| Number of Patients:              | 600 mg (N=9) | 800 mg (N=3) | 1000 mg (N=3) | 1200 mg (N=6) | 1600 mg (N=33) | All Cohorts (N=54) |
|----------------------------------|--------------|--------------|---------------|---------------|----------------|--------------------|
| Paclitaxel Temporarily Withdrawn | 2            | 0            | 2             | 3             | 14             | 21                 |
| Paclitaxel Dose Reduced          | 1            | 0            | 1             | 1             | 4              | 7                  |
| Paclitaxel Permanently Withdrawn | 0            | 0            | 0             | 0             | 4              | 4                  |

**Supplementary Table S3: Adverse Events by Dose Level and Severity Grade**

| <b>Adverse Event Severity Grade</b> | <b>600 mg<br/>(n=9)<br/>n (%)</b> | <b>800 mg<br/>(n=3)<br/>n (%)</b> | <b>1000 mg<br/>(n=3)<br/>n (%)</b> | <b>1200 mg<br/>(n=6)<br/>n (%)</b> | <b>1600 mg<br/>(n=33)<br/>n (%)</b> | <b>Total<br/>(N=54)<br/>n (%)</b> |
|-------------------------------------|-----------------------------------|-----------------------------------|------------------------------------|------------------------------------|-------------------------------------|-----------------------------------|
| Any Event                           | 9 (100)                           | 3 (100)                           | 3 (100)                            | 6 (100)                            | 33 (100)                            | 54 (100)                          |
| Grade 1 (Mild)                      | 1 (11)                            | 0                                 | 0                                  | 0                                  | 1 (3)                               | 2 (4)                             |
| Grade 2 (Moderate)                  | 3 (33)                            | 1 (33)                            | 0                                  | 2 (33)                             | 1 (3)                               | 7 (13)                            |
| Grade 3 (Severe)                    | 4 (44)                            | 1 (33)                            | 1 (33)                             | 4 (67)                             | 27 (82)                             | 37 (69)                           |
| Grade 4 (Life Threatening)          | 1 (11)                            | 1 (33)                            | 1 (33)                             | 0                                  | 4 (12)                              | 7 (13)                            |
| Grade 5 (Fatal)                     | 0                                 | 0                                 | 1 (33)                             | 0                                  | 0                                   | 1 (2)                             |

**Supplementary Table S4: Adverse Events by Dose Level Relationship to Study Drug**

|                                        | <b>600 mg<br/>(n=9)<br/>n (%)</b> | <b>800 mg<br/>(n=3)<br/>n (%)</b> | <b>1000 mg<br/>(n=3)<br/>n (%)</b> | <b>1200 mg<br/>(n=6)<br/>n (%)</b> | <b>1600 mg<br/>(n=33)<br/>n (%)</b> | <b>Total<br/>(N=54)<br/>n (%)</b> |
|----------------------------------------|-----------------------------------|-----------------------------------|------------------------------------|------------------------------------|-------------------------------------|-----------------------------------|
| <b>By Relationship to Paclitaxel</b>   |                                   |                                   |                                    |                                    |                                     |                                   |
| <b>Any Event</b>                       | 9(100)                            | 3(100)                            | 3(100)                             | 6(100)                             | 33(100)                             | 54(100)                           |
| <b>Not Related</b>                     | 1 (11)                            | 0                                 | 0                                  | 0                                  | 2 (6)                               | 3 (6)                             |
| <b>Possibly Related</b>                | 3 (33)                            | 0                                 | 0                                  | 1 (17)                             | 9 (27)                              | 13 (24)                           |
| <b>Probably Related</b>                | 5 (56)                            | 3(100)                            | 3(100)                             | 5 (83)                             | 22 (67)                             | 38 (70)                           |
| <b>By Relationship to Pexidartinib</b> |                                   |                                   |                                    |                                    |                                     |                                   |
| <b>Any Event</b>                       | 9(100)                            | 3(100)                            | 3(100)                             | 6(100)                             | 33(100)                             | 54(100)                           |
| <b>Not Related</b>                     | 1 (11)                            | 0                                 | 0                                  | 0                                  | 2 (6)                               | 3 (6)                             |
| <b>Possibly Related</b>                | 5 (56)                            | 0                                 | 0                                  | 1 (17)                             | 11 (33)                             | 17 (31)                           |

**Supplementary Table S5:** Summary of toxicities that occurred in >10% of patients and were at least possibly related to Pexidartinib:

| Toxicity                               | Grades<br>1 & 2 | Grades<br>3 & 4 | All<br>Grades |
|----------------------------------------|-----------------|-----------------|---------------|
|                                        | Number (%)      |                 |               |
| Fatigue                                | 24 (44)         | 8 (15)          | 32 (59)       |
| Aspartate Aminotransferase Increased   | 15 (28)         | 4 (7)           | 19 (35)       |
| Nausea                                 | 16 (30)         | 3 (6)           | 19 (35)       |
| Anaemia                                | 10 (19)         | 8 (15)          | 18 (33)       |
| Blood Creatine Phosphokinase Increased | 17 (31)         | 0 (0)           | 17 (31)       |
| White Blood Cell Count Decreased       | 15 (28)         | 1 (2)           | 16 (30)       |
| Diarrhoea                              | 14 (26)         | 2 (4)           | 16 (30)       |
| Decreased Appetite                     | 16 (30)         | 0 (0)           | 16 (30)       |
| Neutropenia/Decreased Neutrophils      | 9 (17)          | 5 (9)           | 14 (26)       |
| Vomiting                               | 12 (22)         | 2 (4)           | 14 (26)       |
| Dysgeusia                              | 14 (26)         | 0 (0)           | 14 (26)       |
| Hypertension                           | 7 (13)          | 6 (11)          | 13 (24)       |
| Rash                                   | 8 (15)          | 3 (6)           | 11 (20)       |
| Alanine Aminotransferase Increased     | 9 (17)          | 1 (2)           | 10 (19)       |
| Blood Alkaline Phosphatase Increased   | 8 (15)          | 1 (2)           | 9 (17)        |
| Hypophosphataemia                      | 3 (6)           | 5 (9)           | 8 (15)        |
| Pruritus                               | 7 (13)          | 0 (0)           | 7 (13)        |
| Periorbital Oedema                     | 7 (13)          | 0 (0)           | 7 (13)        |
| Pyrexia                                | 6 (11)          | 0 (0)           | 6 (11)        |
| Constipation                           | 6 (11)          | 0 (0)           | 6 (11)        |

*Count includes only the maximum grade experienced by each patient for each AE term*

**Supplementary Table S6:** Summary of toxicities that occurred in >10% of patients and were at least possibly related to Paclitaxel

| Toxicity                             | Grades<br>1 & 2 | Grades<br>3 & 4 | All<br>Grades |
|--------------------------------------|-----------------|-----------------|---------------|
|                                      | Number (%)      |                 |               |
| Anaemia                              | 18 (33)         | 14 (26)         | 32 (59)       |
| Fatigue                              | 25 (46)         | 7 (13)          | 32 (59)       |
| Neutropenia/Decreased Neutrophils    | 11 (20)         | 12 (22)         | 23 (43)       |
| Diarrhoea                            | 16 (30)         | 4 (7)           | 20 (37)       |
| Aspartate Aminotransferase Increased | 16 (30)         | 3 (6)           | 19 (35)       |
| Lymphocyte Count Decreased           | 8 (15)          | 10 (19)         | 18 (33)       |
| White Blood Cell Count Decreased     | 15 (28)         | 2 (4)           | 17 (31)       |
| Nausea                               | 15 (28)         | 2 (4)           | 17 (31)       |
| Decreased Appetite                   | 17 (31)         | 0 (0)           | 17 (31)       |
| Dysgeusia                            | 15 (28)         | 0 (0)           | 15 (28)       |
| Alopecia                             | 15 (28)         | 0 (0)           | 15 (28)       |
| Vomiting                             | 12 (22)         | 1 (2)           | 13 (24)       |
| Alanine Aminotransferase Increased   | 9 (17)          | 1 (2)           | 10 (19)       |
| Rash                                 | 7 (13)          | 2 (4)           | 9 (17)        |
| Neuropathy Peripheral                | 6 (11)          | 2 (4)           | 8 (15)        |
| Blood Alkaline Phosphatase Increased | 6 (11)          | 1 (2)           | 7 (13)        |
| Pyrexia                              | 7 (13)          | 0 (0)           | 7 (13)        |
| Hypophosphataemia                    | 3 (6)           | 3 (6)           | 6 (11)        |
| Oedema Peripheral                    | 6 (11)          | 0 (0)           | 6 (11)        |
| Pruritus                             | 6 (11)          | 0 (0)           | 6 (11)        |

|                                        |        |       |        |
|----------------------------------------|--------|-------|--------|
| Blood Creatine Phosphokinase Increased | 6 (11) | 0 (0) | 6 (11) |
|----------------------------------------|--------|-------|--------|

Count includes only the maximum grade experienced by each patient for each AE term

**Supplemental Table 7: Pexidartinib Day 15 Plasma Pharmacokinetic Parameters**

| <b>Parameter</b>                                  | <b>600 mg<br/>(n=6)</b> | <b>800 mg<br/>(n=3)</b> | <b>1000 mg<br/>(n=3)</b> | <b>1200 mg<br/>(n=6)</b> | <b>1600 mg<br/>(n=6)</b> |
|---------------------------------------------------|-------------------------|-------------------------|--------------------------|--------------------------|--------------------------|
| <b>C<sub>max</sub> (ng/mL)<br/>Mean (SD)</b>      | 3655 (1447)             | 6783 (1681)             | 4443 (1165)              | 8733 (3591)              | 8772 (4055)              |
| <b>AUC<sup>0-4</sup> (hr*ng/mL)<br/>Mean (SD)</b> | 13318 (5434)            | 22290 (5242)            | 13960 (5378)             | 29495 (10391)            | 28713 (1604)             |
